# Supplementary material for: Rapid prototyping of electrolyzer flow field plates
Source: Royal Society of Chemistry journal article supplement (doi:10.1039/c6ee01997h), 2016-01-01
Supplement: c6ee01997h1.pdf [file c6ee01997h1.pdf]

## Electronic Supplementary Information for:

# 3D-Printed Plastic Components Tailored for Electrolysis

*Jesse R. Hudkins<sup>1</sup>, Danika G. Wheeler<sup>1</sup>, Bruno Peña<sup>2</sup>, Curtis P. Berlinguette<sup>1,2\*</sup>*

<sup>1</sup>Department of Chemical & Biological Engineering, The University of British Columbia, 2360 East Mall, Vancouver, BC V6T1Z3. <sup>2</sup>Department of Chemistry, The University of British Columbia, 2036 Main Mall, Vancouver, BC V6T1Z1.

Corresponding author: [cberling@chem.ubc.ca](mailto:cberling@chem.ubc.ca)

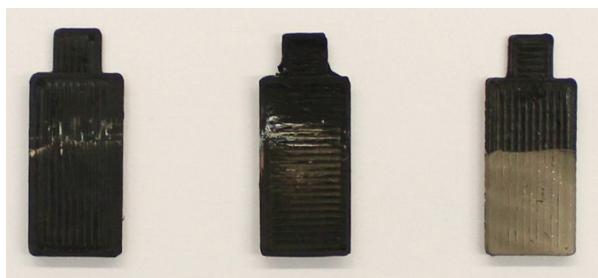

**Figure S1.** Electroplating comparison on 3D-printed electrodes. **Left:** Reprapper Conductive ABS, **Middle:** MatterHackers Conductive ABS, **Right:** Proto-Pasta conductive **PLA**.

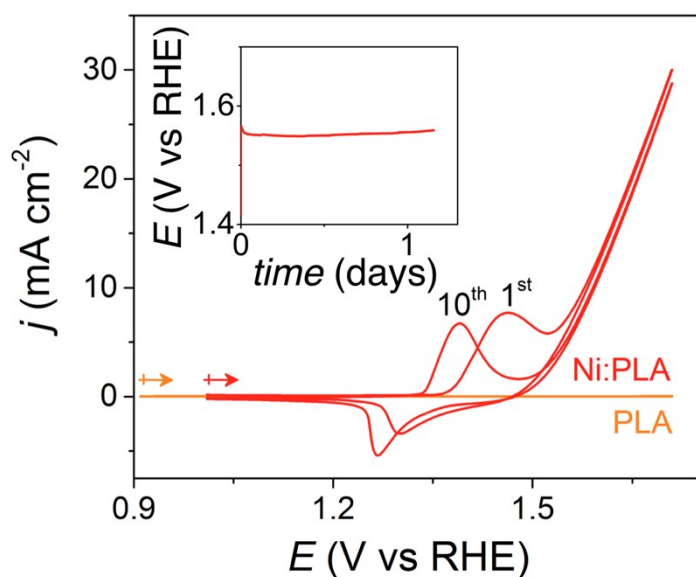

**Figure S2.** First and tenth cyclic voltammogram cycles recorded ( $v = 10 \text{ mV s}^{-1}$ ) on planar Ni:PLA (*red*) and planar PLA (*orange*). Inset: Chronopotentiometry recorded on the planar **Ni:PLA** at a anodic current density of  $4 \text{ mA cm}^{-2}$ . Electrochemistry conditions: counter electrode = nickel foam; reference electrode = Ag/AgCl, KCl (sat'd); electrolyte = 1.0 M KOH (aq). Data not corrected for uncompensated resistance.

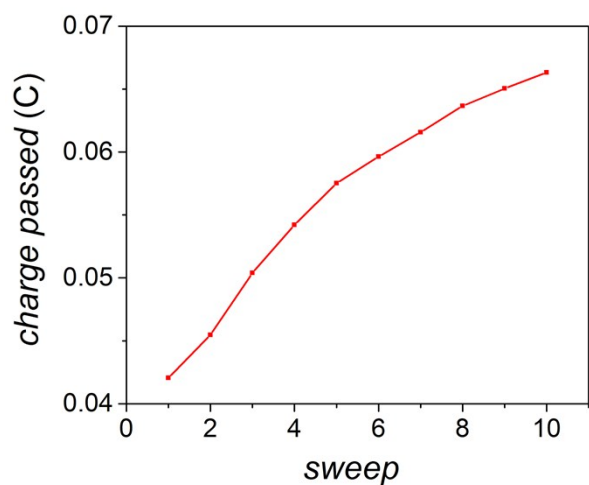

**Figure S3.** The cathodic charge passed over the first 10 cyclic voltammetry sweeps conducted on a planar **Ni:PLA** electrode. Electrochemistry conditions: counter electrode = nickel foam; reference electrode = Ag/AgCl, KCl (sat'd); electrolyte = 1.0 M KOH (aq); cyclic voltammogram scan rate = 10  $\text{mV s}^{-1}$ .

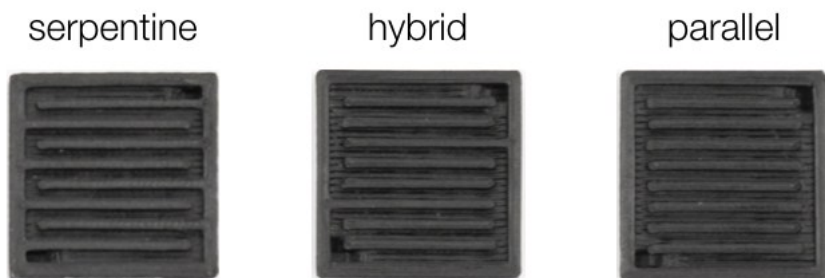

**Figure S4.** 3D-printed flow-field plates with three different flow-field patterns.

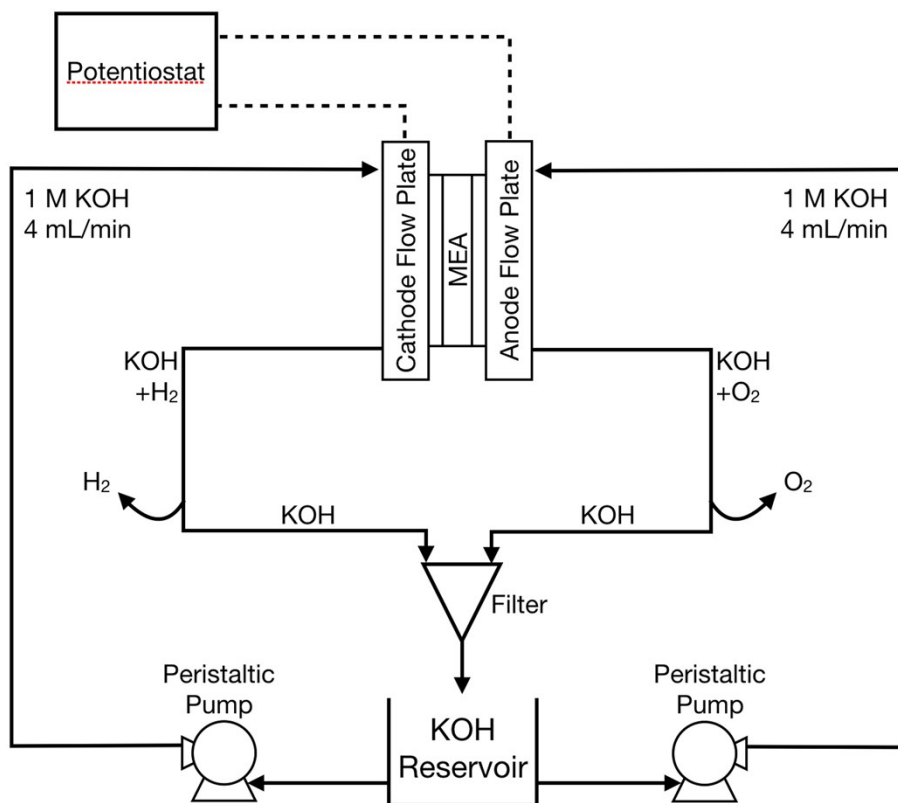

**Figure S5.** Process flow diagram of electrolyzer testing experimental setup. The membrane electrode assembly (MEA) consists of Ni foam gas diffusion layers hot pressed onto a Zirfon™ Perl UTP separator membrane.

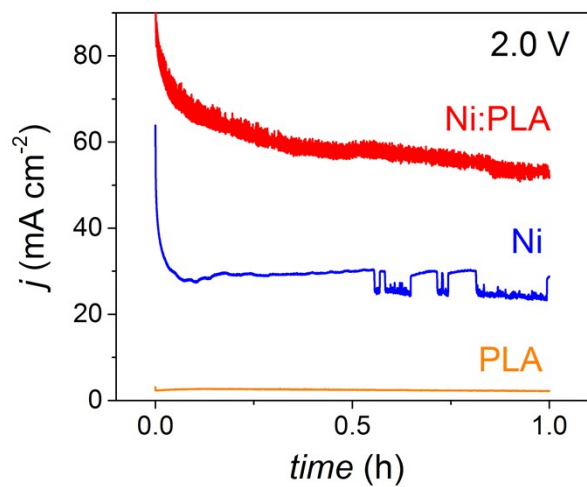

**Figure S6.** Chronoamperometry recorded on electrolyzer cells with flow-field plates made of bulk Nickel 200 (*blue*), carbon PLA (*orange*), and nickel electroplated PLA (*red*). Electrochemistry conditions: applied potential = 2.0 V; electrolyte = 1.0 M KOH<sub>(aq)</sub>.

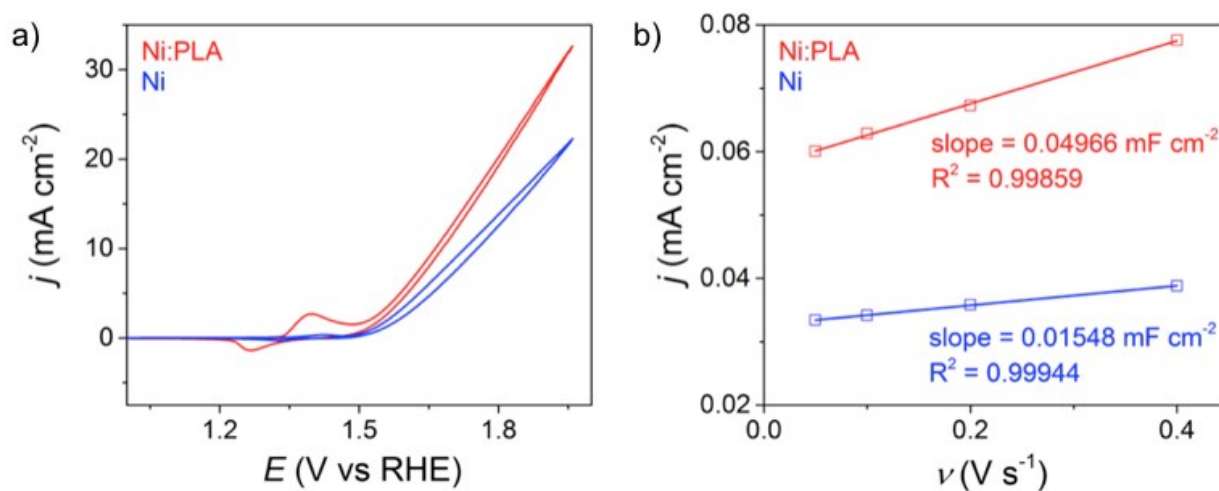

**Figure S7.** (a) First cyclic voltammogram cycle recorded on a **Ni:PLA** flow-field plate (red) and a **Ni** flow-field plate (blue) in a 3-electrode cell. (b) Cyclic voltammograms were measured in a non-Faradaic region of the voltammogram at the following scan rate: 0.05, 0.1, 0.2, and 0.4V/s. The working electrode was held at each potential vertex for >30 s before the beginning the next sweep. All current is assumed to be due to capacitive charging. Electrochemistry conditions: counter electrode = nickel foam; reference electrode = Ag/AgCl, KCl (sat'd); electrolyte = 1.0 M KOH (aq); cyclic voltammogram scan rate = 10 mV s<sup>-1</sup>. Data not corrected for uncompensated resistance.

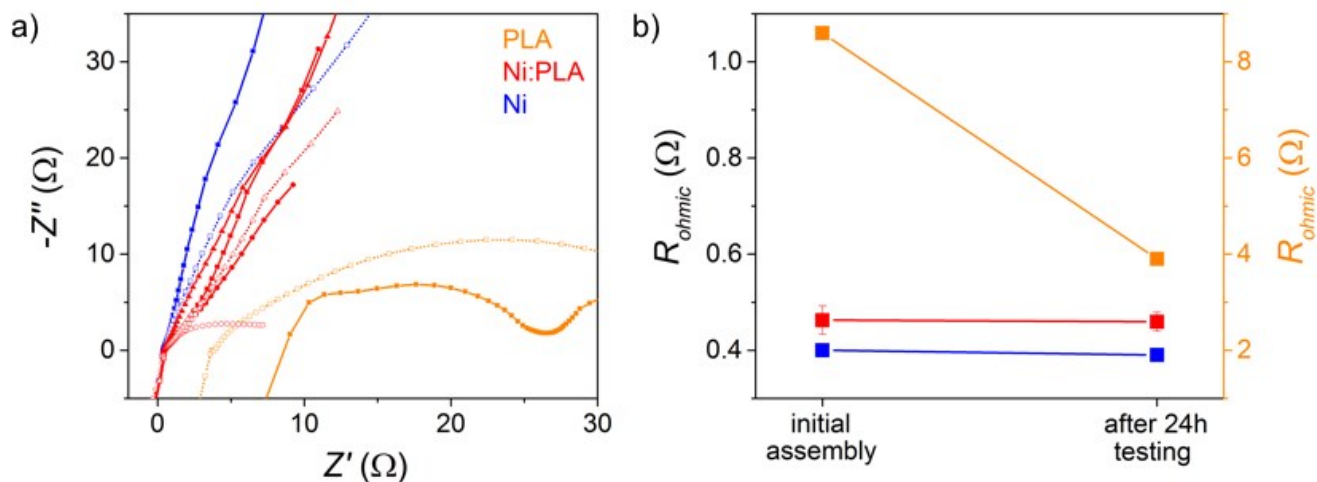

**Figure S8.** Alternating current electrochemical impedance spectroscopy (EIS) recorded on electrolyzers with different flow-field materials. (a) Nyquist plots of EIS recorded on electrolyzer cells with flow-field plates made of bulk Nickel 200 alloy (*blue*), conductive PLA (*orange*), nickel electroplated PLA (*red*). Solid lines indicate data recorded before electrolysis experiments, dashed lines indicate data recorded after 24 h testing. Three different examples of data recorded on Ni:PLA are shown. All EIS was recorded at open cell potential (OCP). (b) Ohmic cell resistances extrapolated from electrochemical impedance spectra recorded on electrolyzer cells with flow-field plates made of bulk Nickel 200 alloy (*blue*), conductive PLA (*orange*), nickel electroplated PLA (*red*).

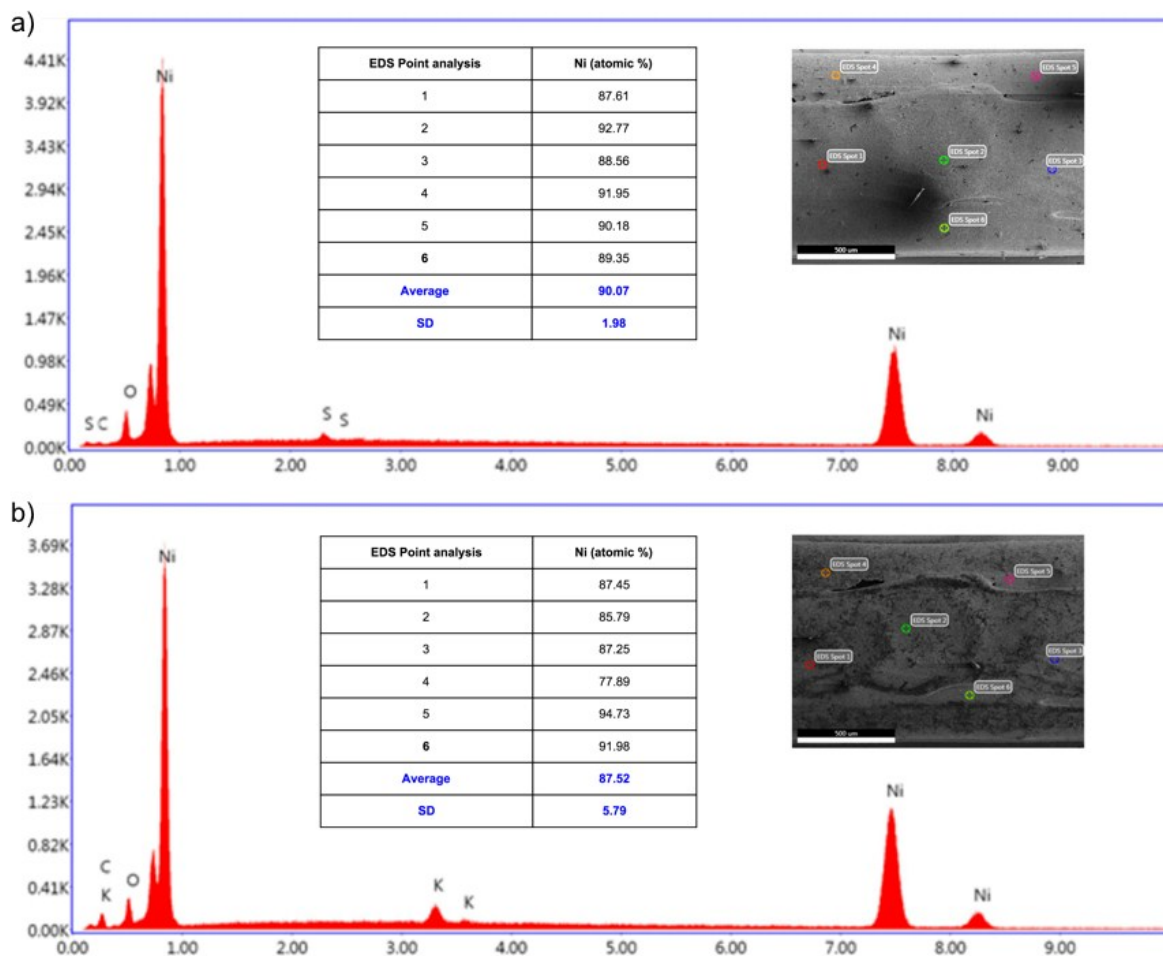

**Figure S9.** Elemental analysis of six different points on the central flow-field rib (fifth rib from top) using Energy-dispersive X-ray spectroscopy. Representative EDS spectrum: X axes = energy (keV); Y axes = intensity (counts). **a**, Before electrolysis. **b**, After 24 h chronoamperometry and 24 h chronopotentiometry.

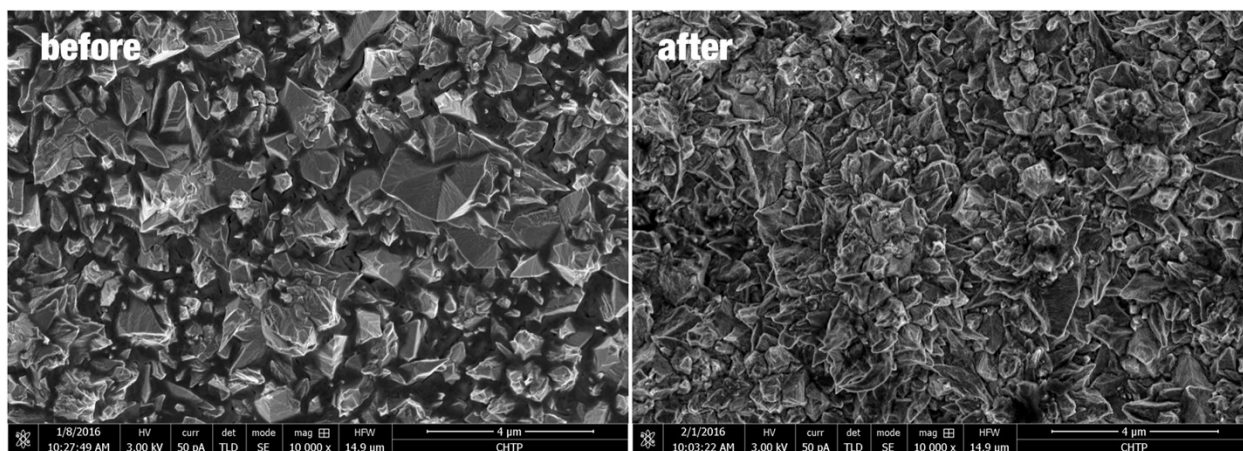

**Figure S10.** SEM image of an electroplated nickel layer on a PLA flow-field plate before and after 48 h of electrolysis.

**Table S1.** Volumetric resistivity of conductive 3D-printing filaments

| plastic filament <sup>1</sup> | resistivity <sup>2</sup> ( $\Omega$ cm) |            | electroplated film thickness |
|-------------------------------|-----------------------------------------|------------|------------------------------|
|                               | parallel                                | orthogonal |                              |
| ABS A <sup>3</sup>            | 6000                                    | 30000      | — <sup>6</sup>               |
| ABS B <sup>4</sup>            | 500                                     | 3000       | — <sup>6</sup>               |
| PLA <sup>5</sup>              | 20                                      | 40         | 13 $\mu$ m                   |

<sup>1</sup>ABS = acrylonitrile butadiene styrene; PLA = polylactic acid. <sup>2</sup>With respect to printing plane. <sup>3</sup>Reprapper Conductive ABS. <sup>4</sup>MatterHackers Conductive ABS <sup>5</sup>Proto-Pasta Conductive PLA. <sup>6</sup>Electroplating could not be achieved.



**Table S2.** Relative prices and densities of flow-field plate materials

| material                              | volumetric pricing (US\$ cm <sup>-3</sup> ) | density (g cm <sup>-3</sup> ) | source        |
|---------------------------------------|---------------------------------------------|-------------------------------|---------------|
| titanium (grade 2)                    | 0.316                                       | 4.51                          | McMaster-Carr |
| graphite (high conductivity)          | 0.155                                       | 1.70 <sup>a</sup>             | McMaster-Carr |
| stainless steel (corrosion resistant) | 0.260                                       | 7.75                          | McMaster-Carr |
| nickel (corrosion resistant)          | 0.196                                       | 8.86                          | McMaster-Carr |
| conductive PLA (filament)             | 0.101                                       | 1.15                          | Proto-pasta   |
| ABS (filament)                        | 0.031                                       | 1.01                          | MatterHackers |

<sup>a</sup>Measured**Table S3.** Techno-economic analysis of electrolyzer bipolar plates zero-gap conventional

| material            | zero-gap |           |          |      | conventional |           |          |      |
|---------------------|----------|-----------|----------|------|--------------|-----------|----------|------|
|                     | actual   |           | relative |      | actual       |           | relative |      |
|                     | mass (g) | cost (\$) | mass     | cost | mass (kg)    | cost (\$) | mass     | cost |
| Nickel              | 44.3     | 0.98      | 5.5      | 1.8  | 6.6          | 147.0     | 6.8      | 1.9  |
| Stainless Steel     | 38.8     | 1.30      | 4.8      | 2.3  | 5.8          | 195.0     | 6.0      | 2.5  |
| Titanium            | 22.6     | 1.58      | 2.8      | 2.8  | 3.4          | 237.0     | 3.5      | 3.0  |
| Conductive PLA      | 5.75     | 0.51      | -        | -    | 0.86         | 75.8      | -        | -    |
| Ni:PLA <sup>a</sup> | 8.10     | 0.56      | 1.0      | 1.0  | 0.97         | 78.2      | 1.0      | 1.0  |

<sup>a</sup>Electrodeposited nickel was assumed to have the same volumetric cost and density as bulk nickel.
